# Supplementary material for: Distinct pulmonary and systemic effects of dexamethasone in severe COVID-19
Source: Research Square preprint supplement (doi:10.21203/rs.3.rs-3168149/v1), 2023-08-03
Supplement: Supplementary file 1 [file 2815c3ac84be7f8ef5f68055.xlsx]

## Sheet: sample list
	Donor id	Time point	COVID-19/Healthy control	Dexamethasone status	IMPACC id	datatype	Cytokine	Bulk PBMC	Single-cell WB	Single-cell ETA	DIABLO	Cytokine	Bulk PBMC	Single-cell WB	Single-cell ETA	NOTE
1	MVIR1-HS1	D0	COVID-19	FALSE		Cytokine,Bulk PBMC,Single-cell WB,DIABLO	1	1	1	0	1	Dryad:doi.org/10.7272/Q6MS3R18		GEO:GSM4995425
2	MVIR1-HS107	D0	COVID-19	FALSE	009-3006	Cytokine,Bulk PBMC,Single-cell ETA,DIABLO	1	1	0	1	1	Dryad:doi.org/10.7272/Q6MS3R18	ImmPort:158800-03		GEO:GSM7517088
3	MVIR1-HS154	D0	COVID-19	TRUE	009-3027	Cytokine,Bulk PBMC,DIABLO	1	1	0	0	1	Dryad:doi.org/10.7272/Q6MS3R18				This sample exists in IMPACC clinical data but the PBMC RNAseq count data for this sample is missing in IMPACC and ImmPort
4	MVIR1-HS156	D0	COVID-19	TRUE	009-4009	Cytokine,Bulk PBMC,DIABLO	1	1	0	0	1	Dryad:doi.org/10.7272/Q6MS3R18	ImmPort:197207-03
5	MVIR1-HS2	D0	COVID-19	FALSE		Cytokine,Bulk PBMC,Single-cell WB,DIABLO	1	1	1	0	1	Dryad:doi.org/10.7272/Q6MS3R18		GEO:GSM4995425
8	MVIR1-HS23	D0	COVID-19	FALSE		Cytokine,Bulk PBMC,DIABLO	1	1	0	0	1	Dryad:doi.org/10.7272/Q6MS3R18
9	MVIR1-HS238	D0	COVID-19	TRUE	009-3061	Cytokine,Bulk PBMC,DIABLO	1	1	0	0	1	Dryad:doi.org/10.7272/Q6MS3R18	ImmPort:114863-03
11	MVIR1-HS253	D0	COVID-19	TRUE	009-3066	Cytokine,Bulk PBMC,DIABLO	1	1	0	0	1	Dryad:doi.org/10.7272/Q6MS3R18	ImmPort:123017-03
12	MVIR1-HS254	D0	COVID-19	TRUE	009-4051	Cytokine,Bulk PBMC,DIABLO	1	1	0	0	1	Dryad:doi.org/10.7272/Q6MS3R18	ImmPort:176723-03
13	MVIR1-HS271	D0	COVID-19	TRUE	009-4061	Cytokine,Bulk PBMC,DIABLO	1	1	0	0	1	Dryad:doi.org/10.7272/Q6MS3R18	ImmPort:198926-02
14	MVIR1-HS276	D0	COVID-19	TRUE	009-3073	Cytokine,Bulk PBMC,DIABLO	1	1	0	0	1	Dryad:doi.org/10.7272/Q6MS3R18	ImmPort:160526-03
16	MVIR1-HS340	D0	COVID-19	TRUE	009-4085	Cytokine,Bulk PBMC,DIABLO	1	1	0	0	1	Dryad:doi.org/10.7272/Q6MS3R18	ImmPort:108510-02
17	MVIR1-HS350	D0	COVID-19	TRUE	009-4090	Cytokine,Bulk PBMC,DIABLO	1	1	0	0	1	Dryad:doi.org/10.7272/Q6MS3R18	ImmPort:192450-03
27	MVIR1-HS419	D0	COVID-19	TRUE		Cytokine,Bulk PBMC,DIABLO	1	1	0	0	1	Dryad:doi.org/10.7272/Q6MS3R18
29	MVIR1-HS43	D0	COVID-19	FALSE		Cytokine,Bulk PBMC,DIABLO	1	1	0	0	1	Dryad:doi.org/10.7272/Q6MS3R18
30	MVIR1-HS50	D0	COVID-19	FALSE		Cytokine,Bulk PBMC,Single-cell WB,Single-cell ETA,DIABLO	1	1	1	1	1	Dryad:doi.org/10.7272/Q6MS3R18		GEO:GSM4995430	GEO:GSM7517091
32	MVIR1-HS59	D0	COVID-19	FALSE		Cytokine,Bulk PBMC,DIABLO	1	1	0	0	1	Dryad:doi.org/10.7272/Q6MS3R18
33	MVIR1-HS72	D0	COVID-19	FALSE		Cytokine,Bulk PBMC,DIABLO	1	1	0	0	1	Dryad:doi.org/10.7272/Q6MS3R18
34	MVIR1-HS77	D0	COVID-19	FALSE		Cytokine,Bulk PBMC,DIABLO	1	1	0	0	1	Dryad:doi.org/10.7272/Q6MS3R18
35	MVIR1-HS78	D0	COVID-19	FALSE		Cytokine,Bulk PBMC,DIABLO	1	1	0	0	1	Dryad:doi.org/10.7272/Q6MS3R18
38	MVIR1-HS94	D0	COVID-19	FALSE	009-3003	Cytokine,Bulk PBMC,DIABLO	1	1	0	0	1	Dryad:doi.org/10.7272/Q6MS3R18	ImmPort:107623-03
130	MVIR1-HS1	D1	COVID-19	FALSE		Single-cell ETA	0	0	0	1	0				GEO:GSM7517087
168	MVIR1-HS161	D4	COVID-19	TRUE	009-4012	Single-cell ETA	0	0	0	1	0				GEO:GSM7517077
134	MVIR1-HS2	D1	COVID-19	FALSE		Single-cell ETA	0	0	0	1	0				GEO:GSM7517089
6	MVIR1-HS215	D0	COVID-19	TRUE	009-4035	Cytokine	1	0	0	0	0	Dryad:doi.org/10.7272/Q6MS3R18
7	MVIR1-HS223	D0	COVID-19	TRUE	009-3055	Cytokine	1	0	0	0	0	Dryad:doi.org/10.7272/Q6MS3R18
169	MVIR1-HS24	D0	COVID-19	FALSE		Single-cell ETA	0	0	0	1	0				GEO:GSM7517090
10	MVIR1-HS244	D0	COVID-19	TRUE	009-4048	Cytokine	1	0	0	0	0	Dryad:doi.org/10.7272/Q6MS3R18
15	MVIR1-HS33	D0	COVID-19	FALSE		Cytokine	1	0	0	0	0	Dryad:doi.org/10.7272/Q6MS3R18
145	MVIR1-HS340	D1	COVID-19	TRUE	009-4085	Single-cell ETA	0	0	0	1	0				GEO:GSM7517078
170	MVIR1-HS357	D2	COVID-19	TRUE	009-4093	Single-cell ETA	0	0	0	1	0				GEO:GSM7517079
147	MVIR1-HS389	D2	COVID-19	TRUE		Single-cell ETA	0	0	0	1	0				GEO:GSM7517080
18	MVIR1-HS389	D0	COVID-19	TRUE		Cytokine	1	0	0	0	0	Dryad:doi.org/10.7272/Q6MS3R18
19	MVIR1-HS395	D0	COVID-19	TRUE		Cytokine	1	0	0	0	0	Dryad:doi.org/10.7272/Q6MS3R18
149	MVIR1-HS398	D4	COVID-19	TRUE		Single-cell ETA	0	0	0	1	0				GEO:GSM7517081
20	MVIR1-HS398	D0	COVID-19	TRUE		Cytokine	1	0	0	0	0	Dryad:doi.org/10.7272/Q6MS3R18
21	MVIR1-HS402	D0	COVID-19	TRUE		Cytokine,Single-cell WB	1	0	1	0	0	Dryad:doi.org/10.7272/Q6MS3R18		GEO:GSM7517094
151	MVIR1-HS403	D2	COVID-19	TRUE		Single-cell ETA	0	0	0	1	0				GEO:GSM7517082
22	MVIR1-HS403	D0	COVID-19	TRUE		Cytokine,Single-cell WB	1	0	1	0	0	Dryad:doi.org/10.7272/Q6MS3R18		GEO:GSM7517095
23	MVIR1-HS405	D0	COVID-19	TRUE		Cytokine,Single-cell WB	1	0	1	0	0	Dryad:doi.org/10.7272/Q6MS3R18		GEO:GSM7517096
171	MVIR1-HS410	D1	COVID-19	TRUE		Single-cell ETA	0	0	0	1	0				GEO:GSM7517083
24	MVIR1-HS412	D0	COVID-19	TRUE		Cytokine,Single-cell WB	1	0	1	0	0	Dryad:doi.org/10.7272/Q6MS3R18		GEO:GSM7517097
154	MVIR1-HS414	D2	COVID-19	TRUE		Single-cell ETA	0	0	0	1	0				GEO:GSM7517084
25	MVIR1-HS414	D0	COVID-19	TRUE		Cytokine,Single-cell WB	1	0	1	0	0	Dryad:doi.org/10.7272/Q6MS3R18		GEO:GSM7517098
155	MVIR1-HS415	D4	COVID-19	TRUE		Single-cell ETA	0	0	0	1	0				GEO:GSM7517085
26	MVIR1-HS415	D0	COVID-19	TRUE		Cytokine,Single-cell WB	1	0	1	0	0	Dryad:doi.org/10.7272/Q6MS3R18		GEO:GSM7517099
28	MVIR1-HS427	D0	COVID-19	TRUE		Cytokine,Single-cell WB	1	0	1	0	0	Dryad:doi.org/10.7272/Q6MS3R18		GEO:GSM7517100
172	MVIR1-HS471	D2	COVID-19	TRUE		Single-cell ETA	0	0	0	1	0				GEO:GSM7517086
31	MVIR1-HS53	D0	COVID-19	FALSE		Cytokine	1	0	0	0	0	Dryad:doi.org/10.7272/Q6MS3R18
162	MVIR1-HS72	D4	COVID-19	FALSE		Single-cell ETA	0	0	0	1	0				GEO:GSM7517092
165	MVIR1-HS89	D1	COVID-19	FALSE		Single-cell ETA	0	0	0	1	0				GEO:GSM7517093
36	MVIR1-HS89	D0	COVID-19	FALSE		Cytokine	1	0	0	0	0	Dryad:doi.org/10.7272/Q6MS3R18
37	MVIR1-HS91	D0	COVID-19	FALSE		Cytokine	1	0	0	0	0	Dryad:doi.org/10.7272/Q6MS3R18
	XHLT1-HS14	NA	Healthy control	NA	NA	Single-cell WB	0	0	1	0	0			GEO:GSM4995454
	XHLT1-HS19	NA	Healthy control	NA	NA	Single-cell WB	0	0	1	0	0			GEO:GSM4995455
	XHLT1-HS20	NA	Healthy control	NA	NA	Single-cell WB	0	0	1	0	0			GEO:GSM4995456
	XHLT1-HS23	NA	Healthy control	NA	NA	Single-cell WB	0	0	1	0	0			GEO:GSM4995457
	XHLT1-HS29	NA	Healthy control	NA	NA	Single-cell WB	0	0	1	0	0			GEO:GSM4995458
	XHLT1-HS3	NA	Healthy control	NA	NA	Single-cell WB	0	0	1	0	0			GEO:GSM4995449
	XHLT1-HS30	NA	Healthy control	NA	NA	Single-cell WB	0	0	1	0	0			GEO:GSM4995459
	XHLT1-HS31	NA	Healthy control	NA	NA	Single-cell WB	0	0	1	0	0			GEO:GSM4995460
	XHLT1-HS32	NA	Healthy control	NA	NA	Single-cell WB	0	0	1	0	0			GEO:GSM4995461
	XHLT1-HS33	NA	Healthy control	NA	NA	Single-cell WB	0	0	1	0	0			GEO:GSM4995462
	XHLT1-HS4	NA	Healthy control	NA	NA	Single-cell WB	0	0	1	0	0			GEO:GSM4995450
	XHLT1-HS5	NA	Healthy control	NA	NA	Single-cell WB	0	0	1	0	0			GEO:GSM4995451
	XHLT1-HS6	NA	Healthy control	NA	NA	Single-cell WB	0	0	1	0	0			GEO:GSM4995452
	XHLT1-HS7	NA	Healthy control	NA	NA	Single-cell WB	0	0	1	0	0			GEO:GSM4995453

## Sheet: external sample list
Sample id	Dataset	COVID-19/Healthy control	Tissue type	Steroid	Steroid status	Accession
C1	Sinha et al	COVID-19	Whole-blood	Dexamethasone	FALSE	GEO:GSM4775023
C3	Sinha et al	COVID-19	Whole-blood	Dexamethasone	FALSE	GEO:GSM4775025
C4	Sinha et al	COVID-19	Whole-blood	Dexamethasone	FALSE	GEO:GSM4775026
C5	Sinha et al	COVID-19	Whole-blood	Dexamethasone	FALSE	GEO:GSM4775027
C6	Sinha et al	COVID-19	Whole-blood	Dexamethasone	FALSE	GEO:GSM4775028
C7	Sinha et al	COVID-19	Whole-blood	Dexamethasone	FALSE	GEO:GSM4775029
C8	Sinha et al	COVID-19	Whole-blood	Dexamethasone	FALSE	GEO:GSM4775030
C9	Sinha et al	COVID-19	Whole-blood	Dexamethasone	FALSE	GEO:GSM4775031
C10	Sinha et al	COVID-19	Whole-blood	Dexamethasone	TRUE	GEO:GSM4775032
C11	Sinha et al	COVID-19	Whole-blood	Dexamethasone	TRUE	GEO:GSM4775033
C12	Sinha et al	COVID-19	Whole-blood	Dexamethasone	TRUE	GEO:GSM4775034
C13	Sinha et al	COVID-19	Whole-blood	Dexamethasone	TRUE	GEO:GSM4910209
C15	Sinha et al	COVID-19	Whole-blood	Dexamethasone	TRUE	GEO:GSM4910210
HC1	Liao et al	Healthy control	BAL	NA	NA	GEO:GSM4475048
HC2	Liao et al	Healthy control	BAL	NA	NA	GEO:GSM4475049
HC3	Liao et al	Healthy control	BAL	NA	NA	GEO:GSM4475050
S1	Liao et al	COVID-19	BAL	Methylprednisolone	FALSE	GEO:GSM4339773
S2	Liao et al	COVID-19	BAL	Methylprednisolone	TRUE	GEO:GSM4339771
S3	Liao et al	COVID-19	BAL	Methylprednisolone	TRUE	GEO:GSM4339774
S4	Liao et al	COVID-19	BAL	Methylprednisolone	TRUE	GEO:GSM4475051
S5	Liao et al	COVID-19	BAL	Methylprednisolone	TRUE	GEO:GSM4475052
S6	Liao et al	COVID-19	BAL	Methylprednisolone	FALSE	GEO:GSM4475053
