# Supplementary material for: Distinct pulmonary and systemic effects of dexamethasone in severe COVID-19
Source: Research Square preprint supplement (doi:10.21203/rs.3.rs-3168149/v1), 2023-08-03
Supplement: Supplementary file 2 [file dcb23083cdf2aca73860c675.xlsx]

## Sheet: cometETA dex+ vs dex-
gene

## Sheet: cometWB dex+ vs dex-
gene

## Sheet: cometWB dex+ vs HC
gene

## Sheet: liaoBAL dex+ vs dex-
gene

## Sheet: liaoBAL dex+ vs HC
gene

## Sheet: sinhaWB dex+ vs dex-
gene
